# Supplementary material for: The Protective Effect of Rhizoma Dioscoreae Extract against Alveolar Bone Loss in Ovariectomized Rats via Regulating Wnt and p38 MAPK Signaling
Source: Nutrients. 2014 Dec 12;6(12):5853–70. doi: 10.3390/nu6125853 (PMC4277003; doi:10.3390/nu6125853)
Supplement: Supplementary File 1 [file nutrients-06-05853-s001.xls]

## Sheet: Sheet1
GeneSymbol	FCAbsolute	p-value
Slc40a1	33.6918	0.0219183
RGD1311224	23.4239	0.0307599
Ibsp	22.7885	0.00478313
Gpr87	20.8455	0.0103422
LOC683313	19.3547	0.0109003
Akr1b8	11.5913	0.0161743
Slc22a4	10.2773	0.0419491
C1qtnf3	9.5112	0.00938573
Uck2	8.93084	0.000204913
Sfrp2	8.85972	0.0324738
Slpi	8.84221	9.79234e-06
Sdcbp2	7.86185	0.013742
RGD1560581	7.64321	0.0337658
Sfrp4	7.60678	0.028652
LOC685385	6.77564	0.0189472
Slc39a8	6.68655	0.0127711
Cct6b	6.64399	0.000215731
Relt	6.41159	4.28958e-05
Zc3h3	6.06699	0.00784699
LOC685249	5.99606	0.0129402
Ptk2b	5.96401	0.0317259
S100a6	5.74435	0.00467417
Nqo1	5.74132	0.0482987
Olr196	5.71884	0.021527
LOC690483	5.70718	0.000518145
LOC100363289	5.63151	0.021035
Tmem86a	5.53002	0.00964424
Dync1i2	5.3785	0.024217
Zfp385d	5.33525	0.0215785
Grm6	5.30889	0.000642828
Foxq1	5.26768	0.0422656
Art5	5.19289	0.000913346
Snap25	5.18038	0.0484623
Ccdc69	5.1802	0.00246944
Igfbp1	5.17688	0.0167457
Usp31	5.10308	0.00090322
Cldnd2	5.08673	4.94921e-05
Olfm1	4.95151	4.045e-05
Olr376	4.93493	0.017189
Wdfy3	4.92408	0.00253435
RGD1561231	4.78987	1.9504e-05
Lin7a	4.77004	0.0174387
Syt12	4.76502	0.00216361
Lypd3	4.66915	0.0216023
Fam162a	4.65948	0.0108495
Mobp	4.65196	0.00151926
Ptgr1	4.61543	0.00133275
Rad18	4.59402	0.0331683
Tnni1	4.56921	0.000157133
Rab1b	4.40326	0.000263988
RGD1561520	4.32061	0.0315979
Pth2	4.30233	2.49105e-05
Slpil2	4.29781	0.00872798
LOC691298	4.28965	0.0214573
LOC690386	4.28264	0.0244588
Lrrc4c	4.27683	0.00188742
Zyx	4.2763	0.0373995
LOC689727	4.22398	0.000475168
RGD1308775	4.18387	0.00642685
RGD1563982	4.1577	0.0261419
RGD1308305	4.15363	0.0353072
Olr230	4.1501	0.00196182
Asb18	4.14994	0.000288737
LOC688390	4.1209	0.002741
Olr124	4.11629	0.00158549
Lmx1b	4.07829	0.0139972
Rdh8	4.07479	0.000412009
Hdhd3	4.06879	0.000281107
Oprd1	4.03501	0.000416964
Cd300lg	4.03452	0.00403296
Tcte1	4.03012	0.0225597
B3galt6	4.01168	0.00522844
Slc12a7	3.98975	0.0294126
Shank1	3.97258	0.00883419
RGD1564571	3.97175	0.0253231
Olr1279	3.96224	0.00109981
Max	3.95062	0.00540935
Vangl2	3.94953	0.000558828
Inhbb	3.94222	0.00921593
Tpd52l1	3.9188	0.0180936
LOC498705	3.89524	0.0154945
Lats2	3.8761	0.00623387
Gtf3c4	3.86585	0.000164874
Chac1	3.83276	0.00730694
Dot1l	3.8295	0.00640789
Olr375	3.81809	0.015768
Lrfn2	3.817	0.000316631
Olr168	3.81319	0.0301768
Vom2r71	3.78927	0.00704576
Il1rn	3.78488	0.00579094
Slc9a8	3.7834	0.00898818
Csf1r	-3.78102	0.000323683
Polr2a	3.77426	0.0136961
Lce1l	3.77012	7.207e-06
Poldip3	3.72178	0.00230158
RGD1561246	3.71534	0.00891772
Kcnk2	3.71345	0.0100004
Cyp2d4	3.71124	0.0405598
Pip4k2b	3.70959	0.00284915
Tspan8	3.70083	0.00708148
Rmnd5a	3.69042	0.000217473
RGD1564016	3.66363	0.000956621
Ctnnal1	3.66152	0.00954579
Serp2	3.66082	0.00974165
Sh3bp1	3.64722	0.000187546
Shisa5	3.62572	0.0234049
Kirrel	3.62146	0.000189855
Tas1r1	3.6197	0.0113946
LOC100363129	3.61515	0.000584
Prpg1	3.60462	0.00223099
Bmp1	3.59516	0.0411589
Olr862	3.58058	0.000206424
Paqr6	3.54519	0.00109084
Nod2	3.53728	0.023803
Sbp	3.53543	0.0036045
Jph2	3.5188	0.0181854
Ermap	3.51577	0.0034046
Cers4	3.51186	0.00162708
Mt2A	3.49909	0.0118865
LOC689927	3.4967	0.0168526
Sssca1	3.48907	2.64184e-06
Rph3a	3.4871	0.00220174
Gpr165	3.46781	0.00260906
Gabrb2	3.46667	0.00102555
Cyp4a1	3.45605	0.043594
Adrb1	3.45304	0.00021959
Padi1	3.45123	0.0378587
Vom1r55	3.44883	0.0158511
LOC501437	3.44262	0.00177305
Tmem40	3.41809	0.00153836
Usp22	3.41721	0.0105932
LOC682329	3.41312	0.00630715
Gstp1	3.37348	0.042232
Kcnq1	3.37328	0.000724851
Zkscan2	3.36129	0.0151821
Nrxn1	3.35608	0.00411924
Cdh6	3.35343	0.00296414
Pygm	3.35118	0.0279868
Gng13	3.34341	0.0498173
Aqp2	3.34095	0.00246343
Kcnj3	3.33602	0.00396672
Prima1	3.3335	0.000343068
Akna	3.32128	9.95471e-05
RGD1563065	3.31974	1.65254e-05
Hcfc1	3.30499	0.0038308
Zfp384	3.28713	0.0260394
LOC684862	3.28522	0.00533575
Lrrc25	3.28304	0.00176753
Cald1	3.25298	0.0237354
Ino80d	3.25144	0.0483979
Mpped1	3.24915	0.0259956
Sall2	3.24703	0.0397129
RGD1565025	3.24382	0.000652384
Igf2r	3.24107	0.00953088
Anxa1	3.24085	0.0139363
LOC294497	3.23296	6.01879e-05
Slc24a2	3.23175	0.00080258
Slc26a1	3.22922	0.00309764
Grhl2	3.22525	0.000493483
Cybasc3	3.21457	0.00927216
Yif1b	3.20449	0.0419138
Atg9a	3.19462	0.000429464
G6pc3	3.1813	0.00667736
Gpbar1	3.17806	0.000687333
Tgfa	3.17707	0.041219
Plxdc1	3.17597	0.0198128
Cuta	3.17282	2.49475e-05
Otop3	3.1684	0.0458004
LOC679199	3.16743	0.0445884
Cep164	3.15366	0.0479866
Olr237	3.15265	0.00317672
Fa2h	3.15175	0.0256362
Cox6b2	3.13707	0.0133303
Pik3r5	3.13637	0.0221503
RGD1305713	3.13059	0.0158343
Plcb4	3.13026	0.000257168
Daxx	3.12894	0.0246219
Slc2a12	3.12888	0.00765918
Mt1a	3.11895	0.0216812
Thop1	3.11704	0.0127061
Lhfpl5	3.1167	0.00341625
Olr1631	3.11662	0.00957703
S1pr3	3.11622	0.000195817
Clint1	3.11053	0.00113877
Hif3a	3.10328	0.0243802
Ldb2	3.09887	0.0235685
Ccr1l1	3.09668	0.000629504
Slc25a35	3.08882	0.0230456
Esr2	3.07979	0.000114267
Acat3	3.07532	0.00699707
Sugt1	3.072	0.00185745
Rpp25	3.07017	0.00633014
LOC689425	3.06985	0.00820921
LOC688562	3.06615	0.0321792
LOC498972	3.06584	0.00173533
Ppp1r3c	3.06541	0.0279352
Coa5	3.06297	0.0010777
Catsperg1	3.06132	0.0196705
Slc20a1	3.05832	0.0140048
Gpr68	3.04957	0.000799793
Dcx	3.03267	0.000165645
Doxl1	3.03233	0.000298475
RGD1563155	3.03183	0.00140336
Car15	3.02019	0.000879355
Dgat2l6	3.00536	0.0483226
Gpr85	3.00507	0.028006
Syngr1	3.00408	0.00153593
Ceacam16	-3.02336	0.0287698
C1s	-3.02497	0.00491076
Cubn	-3.03177	0.00237856
Vmac	-3.04876	0.012672
Acaa1b	-3.06845	0.0487604
Itgb6	-3.07153	0.00160155
Tagln	-3.0789	0.000642309
Cited1	-3.07993	0.0233701
LOC690126	-3.09874	0.0025611
Npy	-3.09902	0.014854
Acpt	-3.10853	0.0457263
Atxn1	-3.10936	0.031525
Il22ra2	-3.11006	0.011089
Slc44a4	-3.12176	0.0346137
Arx	-3.1242	0.0442274
Tmsbl1	-3.12558	0.033061
P4ha3	-3.12653	0.00362436
Cyp1a2	-3.13762	0.0413859
Tbc1d9	-3.15157	0.0499689
Rxrg	-3.15784	0.0475135
Sema4g	-3.16246	0.0381377
Hhatl	-3.16258	0.0310747
Cyp2b3	-3.18251	0.0325178
Stim2	-3.18323	0.0251574
Irx1	-3.18921	0.00219584
Smtnl2	-3.20134	0.0105161
Hbb	-3.20304	0.0162833
Dnah8	-3.20692	0.000472337
Cbs	-3.21447	0.0468923
Fzd2	-3.21724	0.00156278
Vit	-3.2248	0.0273791
B3galt2	-3.23746	0.000807272
Obsl1	-3.24414	0.0322117
Srd5a1	-3.25981	0.000901077
Nrtn	-3.28255	0.0476504
Pkm2	-3.28399	0.00276224
Gmpr	-3.28559	0.0255156
Asb11	-3.31182	0.00875912
Pfkfb1	-3.34964	0.0361918
Cml5	-3.34984	0.0360295
LOC100360472	-3.35276	0.0493771
Pmch	-3.3718	0.0281691
Gli1	-3.40187	0.0315142
Dab1	-3.40401	0.0209339
Bex1	-3.41838	0.0386617
Colq	-3.42923	0.0137763
Zfp641	-3.43051	0.0135093
Lrrc3b	-3.43254	0.00637905
Rasl11b	-3.44265	0.00319311
Tmprss6	-3.44824	0.0312032
Plk5	-3.45232	0.00281129
Kcnh2	-3.479	0.0490595
Sypl2	-3.5328	0.0223463
Cmbl	-3.53668	0.0448541
Cdk1	-3.54017	0.040274
Ky	-3.54149	0.0021093
Txlnb	-3.54344	0.0040523
Tdo2	-3.54968	0.0401111
LOC302022	-3.61252	0.0231804
Fam64a	-3.63458	0.0251877
Pla2g2a	-3.64281	0.0212426
Col14a1	-3.65825	0.0022922
RGD1562196	-3.6599	0.021769
Diaph3	-3.68559	0.0472171
Tcf3	-3.69574	0.0429904
LOC641520	-3.73764	0.037048
LOC686428	-3.76193	0.000217587
Dusp16	-3.77614	0.0180879
LOC100125362	-3.77987	0.00544483
Ntrk3	-3.78005	0.032815
Ckm	-3.80152	0.0405474
Pnoc	-3.80593	0.0130557
LOC365985	-3.81984	0.0345933
Tmem229b	-3.82269	0.0298054
Dnah17	-3.84038	0.00429358
RGD1563060	-3.85737	0.012505
LOC685046	-3.86033	0.00979253
Kng1	-3.87872	0.047451
Smoc2	-3.94347	0.0169349
Adck3	-3.95907	0.0429327
Rerg	-3.96008	0.00715978
Adssl1	-3.96399	0.0248327
Gpc3	-3.97454	0.0158969
Prss12	-3.97715	0.00129246
Tmem35	-4.02969	0.0329075
Steap1	-4.12517	0.000398656
Gpc2	-4.16991	0.0409787
Klhl14	-4.20762	0.0284217
Itga10	-4.2297	0.0430868
Zmynd17	-4.24124	0.000439673
Hist3h2bb	-4.25039	0.0273949
Hmgb2	-4.29855	0.0452179
Rem1	-4.35868	0.00293725
Fn1	-4.38785	0.002645
Bex2	-4.41194	0.000399735
Thbs4	-4.44707	0.000317045
Aard	-4.45329	0.0295527
Ankrd23	-4.45375	0.0359885
Cnr1	-4.476	0.00633699
Rasd2	-4.52466	0.0211071
Abcb4	-4.54899	0.0396036
Klk4	-4.57709	0.0123334
Gzma	-4.61389	0.0069813
Xirp2	-4.65451	0.00720801
Spp1	-4.65771	0.0119694
Plekhh1	-4.70063	0.0172643
Klhl31	-4.70998	0.020793
Rapgef1	-4.72205	0.00919464
Lhx6	-4.83731	0.0023051
RGD1562284	-4.86646	0.00226477
Lrrc39	-4.88536	0.0478212
Cttnbp2	-4.92385	0.0144578
Col22a1	-5.01047	0.0323516
Adipoq	-5.02412	0.0425042
LOC100359999	-5.07518	0.00657507
Mycn	-5.09638	0.00449075
Cdca7	-5.21496	0.0488063
Ttk	-5.21859	0.0471637
Micalcl	-5.2189	0.0303493
Nnat	-5.2426	0.0459244
Plcl2	-5.30853	0.00850251
Zdhhc23	-5.33202	0.00158631
Grip1	-5.42562	0.000784645
Frzb	5.45845	0.0237831
Arg2	-5.47216	0.00847114
Asb12	-5.50249	0.0350772
Srpx2	-5.72689	0.0190859
Ube2c	-5.76813	0.0305417
Pcp4l1	-5.76933	0.0479936
Wnt7a	-5.8705	0.0134217
Ccnb1	-5.95445	0.0443367
Chrdl1	-6.11531	0.0186507
Smpd3	-6.23275	0.0189987
Kcne2	-6.29454	0.0115393
Hfe2	-6.41367	0.00310894
G0s2	-6.42374	0.0183642
Capn6	-6.57289	0.0258408
Kbtbd10	-6.72757	0.0133108
Clec1b	-6.78061	0.023946
Cst6	-6.83207	0.000112627
Cyp4f1	-6.86624	0.0373794
Cd7	-6.90987	0.039003
Efnb3	-7.00711	0.0474139
Grem2	-7.2393	0.00955493
Rbm20	-7.36162	0.0111915
Tesc	-7.36907	0.00581833
Gdf10	-7.40909	0.0175951
Aqp4	-8.03952	0.0363937
Gpd1	-8.2487	0.014988
Cldn20	-8.28608	0.0071343
Dpf1	-8.75928	0.00312972
Bmper	-8.88585	0.0272068
Barx1	-8.92267	0.035007
C2cd4d	-8.99569	0.00331539
Ces1d	-9.05245	0.0027707
Cd24	-9.11633	0.00429643
Chst1	-9.69106	0.0405666
Zbtb8b	-10.158	0.00847181
Calb1	-10.5293	0.00352715
Mepe	-10.9473	0.032802
Sostdc1	-11.0984	0.00345436
LOC688972	-11.2977	0.00900762
Mepe	-11.413	0.0301272
Tspan33	-11.6802	0.00977961
G7c	-13.2361	0.00341779
RGD1562107	-13.3766	0.00917136
Hsd11b2	-13.6153	0.00364522
Mfsd2a	-14.3852	0.0219706
Per3	-16.0619	0.000333586
Rnf224	-16.1814	0.00594209
Helt-ps1	-16.5559	0.00171785
PCOLCE2	-17.1397	0.00647063
Entpd3	-21.1733	0.0200458
Ctnna2	-22.2805	0.0065869
Fxyd4	-43.5563	0.0365917
Mapk14	-61.0401	0.000504019
